# Supplementary material for: A landscape analysis of clinical trials and infant clinical trials in Kenya, Ethiopia, and Nigeria
Source: Front Epidemiol. 2024 Aug 15;4:1417419. doi: 10.3389/fepid.2024.1417419 (PMC11357950; doi:10.3389/fepid.2024.1417419)
Supplement: Supplementary file 3 [file Table3.xlsx]

## Sheet: Clinical Trial Institutions
Institutions carrying out Clinical Trials in Kenya - 2017 to 2022
The institution where the research is to be/ has been undertaken
1	Aga Khan University, Nairobi
2	Victoria Biomedical Research Institute
3	AMREF Kenya
4	Strathmore University Medical Centre (Nairobi City county)
5	The Karen Hospital
6	Gertrude’s Clinical Trials
7	Kenya AIDSVaccine Initiative- Institute of Clinical Research (KAVI-ICR), University of Nairobi
8	Dept of Obs & Gynae, University of Nairobi
9	Dept. of orthopedic surgery, University of Nairobi
10	Clinical Trials MTRH/MU-IREC
11	KEMRI
12	International Cancer Institute
13	The Nairobi Hospital (Nairobi City county)
14	City Eye Hospital
15	Jomo Kenyatta University of Agriculture and Technology
16	Kenyatta University
17	KEMRI Welcome Trust Programme (KWRTP)

## Sheet: All Clinical Trials in Kenya- U
OfficialScientificTitle	TrialType	TrialPhase	ActualStartDate	CompletionDate	RecruitmentStatus	PublicationURL	Diseases	AgeGroup	Gender	MinAge	MinAgeType	MaxAge	MaxAgeType	RecruitmentCentreName	CollaboratorName
A Randomized, Observer-blind, Placebo-controlled, Two part, Phase 2 Study to Evaluate the Safety, Tolerability and Immunogenicity of Two Prime-boost Regimens of the Candidate Prophylactic Vaccines for Ebola Ad26.ZEBOV and MVA-BN-Filo	RCT	Phase-2	2015-12-10	2018-12-12	Completed		Infections and Infestations; Other	Adolescent: 13 Year-18 Year; Adult: 19 Year-44 Year; Middle Aged: 45 Year(s)-64 Year(s); Aged: 65+ Year(s)	Both	18	Year(s)	70	Year(s)	Clinical Research Centre Walter Reed Program Nigeria; Kenya Medical Research Institute Walter Reed Projec; Kenya Medical Research Institute Walter Reed Projec; Polana Canico Health Research and Training Center ; NIMR Mbeya Medical Research Centre; Makerere University Walter Reed Project	DOD Walter Reed Program Nigeria; Defence Reference Laboratory, Ministry of Defence Health Implementation Program; NMOD Health Implementation Program; U.S. Military HIV Research Program (MHRP), Walter Reed Army Institute of Research (WRAIR)
Effect of Umbilical Cord Milking versus Delayed Cord Clamping on Selected Hematological and Clinical Parameters in Preterm Neonates at Kenyatta National Hospital: A Randomized Controlled Trial. .	RCT	Phase-3	1900-01-01	1900-01-01	Completed		Other	New born: 0 Day-1 Month; Middle Aged: 45 Year(s)-64 Year(s); Infant: 0 Month-23 Month; Infant: 1 Month-23 Month; Preschool Child: 2 Year-5 Year; Child: 6 Year-12 Year; Adolescent: 13 Year-18 Year; Adult: 19 Year-44 Year	Both	0	Day(s)	64	Year(s)	kenyatta national hospital
An assessment of the effectiveness of metformin in preventing prednisone-induced hyperglycemia among hematological cancer patients at Kenyatta National Hospital	RCT	Phase-2	2018-06-25	1900-01-01	Recruiting		Nutritional, Metabolic, Endocrine	Adult: 19 Year-44 Year; Middle Aged: 45 Year(s)-64 Year(s); Aged: 65+ Year(s)	Both	18	Year(s)	80	Year(s)	Kenyatta National Hospital
Open-label, Phase 3 efficacy and safety study of L-praziquantel orodispersible tablets (L-PZQ ODT) in Schistosoma-infected children 3 months to 6 years of age, including a 2:1 randomized, controlled cohort of Schistosoma mansoni-infected children 4 to 6 years of age treated with L-PZQ ODT or commercial PZQ (BiltricideÂ®).	RCT	Phase-3	2020-09-02	2021-08-07	Completed		Infections and Infestations	Infant: 1 Month-23 Month; Preschool Child: 2 Year-5 Year; Child: 6 Year-12 Year	Both	3	Month(s)	6	Year(s)	Regional Hospital CHR de Man; Homa Bay County Teaching and Referral Hospital	Merck KGaA; Astellas Pharma Inc.; Swiss Tropical and Public Health Institute; Farmanguinhos; Schistosomiasis Control Initiative; Kenya Medical Research Institute; Universite Felix Houphouet Boigny; Lygature
CLINICAL PROTOCOL FOR ASSESSING THE SAFETY AND EFFECTIVENESS OF LOCALLY MANUFACTURED LOW COST MEDICAL EQUIPMENT FOR MATERNAL, NEWBORN, AND CHILD HEALTH: A PROSPECTIVE, NON-RANDOMIZED, QUASI- EXPERIMENTAL, CONTROLLED TRIAL FOR THE IMPROVEMENT OF MATERNAL, NEWBORN, AND CHILD HEALTHCARE IN NAIROBI, KENYA	CCT	Phase-2	1900-01-01	1900-01-01	Recruiting		Neonatal Diseases; Pregnancy and Childbirth	New born: 0 Day-1 Month; Adult: 19 Year-44 Year	Both	0	Day(s)	49	Year(s)	Kenyatta National Hospital	Kenyatta National Hospital
A Health systems approach to prevention of FGM using Person-Centered Communication: Implementation Research Project in Guinea, Somalia and Kenya	RCT	Phase-1	1900-01-01	1900-01-01	Not yet recruiting		Other	Adult: 19 Year-44 Year; Middle Aged: 45 Year(s)-64 Year(s); Adolescent: 13 Year-18 Year	Both	15	Year(s)	65	Year(s)	University of Narobi; Kenya Ministry of Health; Guinea Ministry of Health; Somaliland Ministry of Health	Professor Patrick Muia Ndavi; Professor Mamadou Balde; Mr Ahmed Diriye
Efficacy and safety of Praziquantel alone or in combination with Artemisinin-based combinations in the treatment of children with Schistosoma mansoni in Mwea, Kirinyaga County, Kenya	RCT	Phase-3	2018-09-10	2019-04-01	Completed		Infections and Infestations	Adolescent: 13 Year-18 Year; Child: 6 Year-12 Year	Both	6	Year(s)	15	Year(s)	Mwea area
Efficacy and cost of post cesarean pain management using the World Heath Organization versus the Nyeri County referral Hospital: A randomized control trial	RCT	Phase-3	2019-06-03	2019-11-03	Completed		Surgery	Adult: 19 Year-44 Year	Female	18	Year(s)	45	Year(s)	Nyeri county referral hospital
Evaluating a service model for management of hypertension and diabetes among low and middle- income patients enrolled on M-TIBA in Kenya	RCT	Phase-3	1900-01-01	1900-01-01	Closed to recruitment,follow-up continuing		Circulatory System; Nutritional, Metabolic, Endocrine	Adult: 19 Year-44 Year; Middle Aged: 45 Year(s)-64 Year(s); Aged: 65+ Year(s); 80 and over: 80+ Year	Both	18	Year(s)	99	Year(s)	Access Afya kwa Njenga clinic; Access Afya Taasia Clinic; Limuru Nursing Home; St Johns Hospital; Coptic Mission Hospital; Kima Mission Hospital; Jumuia Friends Kamusinga Hospital; Mungoma Hospital ; Melchizedek Hospital
Mosquitocidal effect and pharmacokinetics of different ivermectin dose regimens in preparation for BOHEMIA cluster randomized controlled trial.	RCT	Phase-2	1900-01-01	2022-06-21	Completed		Infections and Infestations; Obstetrics and Gynecology	Adult: 19 Year-44 Year; Middle Aged: 45 Year(s)-64 Year(s)	Both	18	Year(s)	45	Year(s)	KEMRI Wellcome Trust Research Programme	IS Global; University of Basel; University Hospital Bern; University of Pwani
A multicenter, open-label, single-arm study to evaluate the PK, safety, tolerability and efficacy of a new artemether-lumefantrine (2.5 mg:30 mg) dispersible tablet in the treatment of infants and neonates <5 kg body weight with acute uncomplicated Plasmodium falciparum malaria.	CCT	Phase-2	2020-12-21	1900-01-01	Recruiting		Infections and Infestations; Paediatrics	New born: 0 Day-1 Month; Infant: 1 Month-23 Month	Both	1	Day(s)	1	Year(s)	Novartis Pharma AG; Groupe de Recherche Action en Sante GRAS; Unite de Recherche Clinique; KEMRI Kombewa Clinical Research Centre; MRTC University of Science Techniques and Technology; Department of Paediatrics University of Calabar; Hopital General de Reference St Luc; St Pauls Mission Hospital	Medicines for Malaria Venture ; Groupe de Recherche Action en Sante GRAS; Institut de Recherche en sciences de la Sante
Single-dose HPV catch-up vaccination efficacy: A blinded, randomized study of single-dose HPV vaccination among adolescent girls and young women in Kenya	RCT	Phase-4	2018-12-20	2023-06-30	Closed to recruitment,follow-up continuing		Cancer	Adolescent: 13 Year-18 Year; Adult: 19 Year-44 Year	Female	15	Year(s)	20	Year(s)	Kargeno
Next generation real-time monitoring for PrEP adherence in young Kenyan women_x000D_	RCT	Phase-4	2016-12-21	2020-12-31	Closed to recruitment,follow-up continuing		Infections and Infestations	Adult: 19 Year-44 Year	Female	18	Year(s)	65	Year(s)	Thika Level 5 hospital; Ruiru SubCounty hosptial	Massachusetts General Hospital
An implementation project to scale-up delivery of antiretroviral-based HIV-1 prevention among Kenyan HIV-1 serodiscordant couples_x000D_	CCT	Phase-4	2017-02-27	1900-01-01	Active, not recruiting		Infections and Infestations	Adult: 19 Year-44 Year; Middle Aged: 45 Year(s)-64 Year(s)	Both	18	Year(s)	65	Year(s)	KEMRI CCR PHRD THIKA PROJECT; Thika level 5 hospital; St. Marys Hospital; Nyeri PGH; Karatina SubCounty Hospital; Kerugoya County Hospital; Muranga County Hospital; Ruiru sub county hospital; Kiambu County referral hospital; Kikuyu Mission Hospital; Mbagathi Subcounty hospital; COPTIC Hospital; Pumwani Maternity Hospital	Ministry of Health Facilites as provided in the Recruitment centers.; Kenya Medical Research Institute; University of Washington
A Phase 3 Double Blind Safety and Efficacy Study of Long-Acting Injectable Cabotegravir Compared to Daily Oral TDF/FTC for Pre-Exposure Prophylaxis in HIV-Uninfected Women	RCT	Phase-3	1900-01-01	1900-01-01	Active, not recruiting		Infections and Infestations	Adult: 19 Year-44 Year	Female	18	Year(s)	45	Year(s)	Jaramogi Oginga Odinga Teaching and referral Hospital	Kenya Medical Research Institute
SMART-DAPPER: Leveraging the Depression And Primary-care Partnership for Effectiveness-implementation Research Project (SMART-DAPPER)	integrated mental health care with corresponding effectiveness and implementation values.
A Randomized, Placebo-Controlled Trial of HPV Vaccination to Reduce Cervical High-Grade Squamous Intraepithelial Lesions_x000D_ among HIV-Infected Women Participating in an HPV Test-and-Treat Program (COVENANT) A Trial of the AIDS Malignancy Consortium (AMC)	RCT	Phase-3	2020-04-27	2024-04-29	Not yet recruiting	https://www.cancer.gov/about-nci/organization/oham/hiv-aids-research/oham-research/aids-malignancy-consortium	Cancer	Adult: 19 Year-44 Year; Middle Aged: 45 Year(s)-64 Year(s)	Female	25	Year(s)	65	Year(s)	Moi University School of Medicine
PRObiotics and SYNbiotics in infants in Kenya; the PROSYNK study	RCT	Phase-2	2020-10-28	1900-01-01	Closed to recruitment,follow-up continuing	https://trialsjournal.biomedcentral.com/articles/10.1186/s13063-022-06211-1	Digestive System; Nutritional, Metabolic, Endocrine; Paediatrics	Infant: 0 Month-23 Month	Both	1	Day(s)	3	Day(s)	Homa Bay District Hospital
A Multicenter, Phase III, Double-blind, Randomized, Active-controlled Study to Evaluate the Efficacy and Safety of VPM1002 in Comparison to BCG in Prevention of Mycobacterium Tuberculosis Infection in Newborn Infants	RCT	Phase-3	2020-11-09	1900-01-01	Recruiting		Infections and Infestations	New born: 0 Day-1 Month	Both	0	Day(s)	14	Day(s)	Ifakara Health Institute IHI; Kenya Medical Research Institute Center for Respiratory Disease Research KEMRI CRDR; Medical Research Council Uganda Virus Research Institute and London School of Hygiene and Tropical Medicines Uganda Research Unit MRC UVRI and LSHTM; Makerere University CISMAC; Respiratory and Meningeal Pathogens Research Unit RMPRU; South African Tuberculosis Vaccine Initiative SAT…	Vakzine Projekt Management GmbH; IAVI
Menstrual Cups and Cash Transfer to Reduce Sexual and Reproductive Harm and School Dropout in Adolescent Schoolgirls in Western Kenya: a Cluster Randomised Controlled Trial	RCT	Phase-4	2017-02-28	2021-06-30	Completed	https://bmcpublichealth.biomedcentral.com/articles/10.1186/s12889-019-7594-3	Infections and Infestations; Obstetrics and Gynecology	Adolescent: 13 Year-18 Year; Adult: 19 Year-44 Year	Female	11	Year(s)	35	Year(s)	Apuoyo Mixed Secondary School; Argwings Kodhek Secondary SChool; Dienya Mixed secondary school; Gongo Warom Secondary School; Kaudha Mixed Secondary School; Lundha Mixed Secondary School; Luri Secondary School; Malele mixed Secondary School; Mutumbu Girls Secondary School; Ndegwe Mixed Secondary School; Ndori Mixed Secondary School; Nyagondo Mixed Secondary School; Nyalunya Mixed Secondary School…	Centre for Global Health Research Kenya Medical Research Institute; Safe Water and AIDS Project; CDC Kenya
Pilot trial to examine the feasibility, acceptability, and impact on longer-term adherence of an intervention using a new urine-based tenofovir adherence assay	RCT	Phase-4	1900-01-01	1900-01-01	Not yet recruiting		Infections and Infestations	Adolescent: 13 Year-18 Year; Adult: 19 Year-44 Year; Middle Aged: 45 Year(s)-64 Year(s); Aged: 65+ Year(s)	Female	18	Year(s)	65	Year(s)	KEMRI CCR PHRD THIKA PROJECT	University of California San Francisco ; University of Washington; Kenya Medical Research Institute
Evaluation of open-label Pre exposure prophylaxis (PrEP) delivery amongKenyan women	CCT	Phase-4	1900-01-01	1900-01-01	Closed to recruitment,follow-up continuing		Infections and Infestations	Adult: 19 Year-44 Year	Female	16	Year(s)	25	Year(s)	CMR KEMRI LUMUMBA
Prevention of maternal and neonatal death/infections with a single oral dose of Azithromycin in women in labor (in low- and middle-income countries): a Randomized Controlled Trial	RCT	Phase-4	2020-04-01	2023-12-15	Recruiting	https://globalnetwork.azurewebsites.net	Infections and Infestations; Obstetrics and Gynecology; Paediatrics; Other	New born: 0 Day-1 Month; Adult: 19 Year-44 Year	Female	18	Year(s)	40	Year(s)	Kenya site 12 Eldoret	Indiana University
Rifapentine-containing treatment shortening regimens for pulmonary tuberculosis: A randomized, open-label, controlled phase 3 clinical trial	RCT	Phase-3	1900-01-01	1900-01-01	Completed		Infections and Infestations	Adolescent: 13 Year-18 Year; Adult: 19 Year-44 Year; Middle Aged: 45 Year(s)-64 Year(s)	Both	12	Year(s)	64	Year(s)	Kisumu Clinical Research Site Jaramogi Oginga Odinga Teaching and Referral Hospital	AIDS Clinical Trials Group; Centers for Disease Control; National Institute of Health
HIV self-testing to improve the efficiency of PrEP delivery	RCT	Phase-4	2018-05-28	1900-01-01	Closed to recruitment,follow-up continuing		Infections and Infestations	Adult: 19 Year-44 Year; Middle Aged: 45 Year(s)-64 Year(s); Adolescent: 13 Year-18 Year; Aged: 65+ Year(s)	Both	18	Year(s)	65	Year(s)	Partners in Prevention House	Kenya Medical Research Institute; Universtity of Washington
A Phase 3, Randomized, Double-Blind, Placebo-Controlled Study of Voxelotor (GBT440) in Pediatric Participants with Sickle Cell Disease (HOPE Kids 2)	RCT	Phase-3	1900-01-01	2024-02-29	Not yet recruiting		Haematological Disorders; Paediatrics	Preschool Child: 2 Year-5 Year; Child: 6 Year-12 Year; Adolescent: 13 Year-18 Year	Both	2	Year(s)	15	Year(s)	Korle Bu Teaching Hospital; Komfo Anokye Teaching Hospital; Gertrude Childrens Hospital; Kenyatto National Hospital; Strathmore University Medical Centre
Safety and Pharmacokinetics of the Combination Broadly Neutralizing Antibodies, 3BNC117-LS-J and 10-1074-LS-J, in Healthy American and African Adults	RCT	Phase-2	2020-02-18	1900-01-01	Recruiting		Infections and Infestations	Adult: 19 Year-44 Year	Both	18	Year(s)	45	Year(s)	Partners in Health Research and Development CCR KEMRI ; Kenya Aids Vaccine Initiative; UVRI IAVI; Infectious Diseases Institute; Center for Family Health Research; The Wits RHI	University of Washington ; Rockefeller University ; KAVI
A phase Ib/II single-blinded, randomised, controlled study to determine safety, immunogenicity and efficacy of the candidate Coronavirus Disease (COVID-19) vaccine ChAdOx1 nCoV-19 in adults in Kenya (COV004)	RCT	Phase-1	1900-01-01	2022-05-31	Recruiting		Infections and Infestations	Adult: 19 Year-44 Year; Middle Aged: 45 Year(s)-64 Year(s); Adolescent: 13 Year-18 Year	Both	18	Year(s)	55	Year(s)	KEMRI Wellcome Trust Research Programme Centre for Geographic Medicine Coast KWTRP CGMRC	Chief Administrative Secretary Rashid Aman
Chemoprevention with monthly IPTp with dihydroartemisinin-piperaquine for malaria in HIVinfected pregnant participants on daily cotrimoxazole in Kenya and Malawi: a multi-centre placebocontrolled trial	RCT	Phase-3	2019-11-11	2021-07-31	Recruiting		Infections and Infestations	Adolescent: 13 Year-18 Year; Adult: 19 Year-44 Year	Female	13	Year(s)	44	Year(s)	Ahero County Referral Hospital; Akala Subcounty Hospital; Homabay County Referral Hospital; Rabuor Subcounty referral Hospital	Kenya Medical Research Institute
IPTp With Dihydroartemisinin-piperaquine and Azithromycin for Malaria, Sexually Transmitted and Reproductive Tract Infections in Pregnancy in High Sulphadoxine-pyrimethamine Resistance Areas in Kenya, Malawi and Tanzania: an International Multi-centre 3-arm Placebo-controlled Trial	RCT	Phase-3	2018-03-15	2020-03-20	Completed		Infections and Infestations; Infections and Infestations	Adolescent: 13 Year-18 Year; Adult: 19 Year-44 Year	Female	13	Year(s)	44	Year(s)	Ahero Sub County Hospital; Homabay County Referral Hospital; Rabuor Sub county Hospital; Akala Sub County Hospital	Kenya Medical Research Institute
A phase 2b study to evaluate the safety and efficacy of VRC01 broadly neutralizing monoclonal antibody in reducing acquisition of HIV-1 infection in women in sub-Saharan Africa. DAIDS DOCUMENT ID 12045	RCT	Phase-2	2016-12-06	1900-01-01	Closed to recruitment,follow-up continuing		Infections and Infestations	Adult: 19 Year-44 Year	Female	18	Year(s)	40	Year(s)	Kisumu Clinical Research Site	Kenya Medical Research Institute
The Chloroquine/hydroxychloroquine prevention of coronavirus disease (COVID-19) in the healthcare setting; a randomized, placebo-controlled prophylaxis study (COPCOV)	RCT	Phase-3	2021-02-04	1900-01-01	Recruiting		Infections and Infestations	Adult: 19 Year-44 Year; Middle Aged: 45 Year(s)-64 Year(s); Aged: 65+ Year(s)	Both	18	Year(s)	65	Year(s)	Kenya Medical Research Institute CGMRC; Kenya Medical Research Institute CGHR; Fountain Projects and Research Office Clinical Research Center	Professor Sir Nicholas White; Dr William Schilling
A randomized control trial comparing convalescent plasma therapy plus standard treatment versus standard treatment alone in patients with severe COVID-19 pneumonia at a tertiary hospital	RCT	Phase-3	2020-08-01	2021-12-31	Not yet recruiting	Not yet sent for publication	Infections and Infestations	Adult: 19 Year-44 Year; Middle Aged: 45 Year(s)-64 Year(s); Aged: 65+ Year(s); 80 and over: 80+ Year	Both	18	Year(s)	80	Year(s)	Kenyatta University Teaching Referral and Research Hospital	Dr Sam Aketch; Dr Marion Kiguoya Njau; Dr Kimondo Mutambuki; Dr Peter Karuiki Ngugi; Dr Sultana Sherman; Dr mary Mwangi; Prof Olive Mugenda; Dr Ifrah Hersi; Dr Diane Otieno; Dr Maureen Nganga; Dr Idris; Mercy Kahare; Mr Wilfred Gatua; Dr John Kaumba Nzioka
A Phase 1 Trial of ChAdOx1- and MVA-vectored Conserved Mosaic HIV-1 Vaccines in Healthy, Adult HIV-1-negative Volunteers in Eastern and Southern Africa.	RCT	Phase-1	2020-06-29	2022-12-30	Completed	Not Applicable	Infections and Infestations	Adult: 19 Year-44 Year; Middle Aged: 45 Year(s)-64 Year(s); Adolescent: 13 Year-18 Year	Both	18	Year(s)	50	Year(s)	Zambia Emory HIV Research Project ; Kenya AIDS Vaccine Institute for Clinical Research ; Kenya Medical Research Institute Wellcome Trust; Medical Research and Uganda Virus Research Institute and London School of Hygiene and Tropical Medicine Uganda Research Unit.	University of Nairobi ; KEMRI Wellcome Trust Research Programme ; Zambia Emory HIV Research Project ; MRC UVRI and LSHTM Uganda Research Unit ; Centre for Immunology Vaccinology Imperial College; IAVI
Phase III, multi-center, randomized, active-controlled, open-label, three-arm, study in 690 infants who will receive a 3-dose primary series at 6, 10 and 14 weeks of age, of either 3-dose SHAN6â„¢ or SHAN6â„¢ â€“ SHAN 5Â® + bOPV â€“ SHAN6â„¢ or SHAN 5Â® + bOPV â€“ SHAN 5Â® + bOPV â€“ SHAN 5Â® + bOPV + IPV, and a booster dose of either SHAN6â„¢ or SHAN 5Â® + bOPV at 18 months of age	RCT	Phase-3	1900-01-01	1900-01-01	Not yet recruiting		Infections and Infestations; Paediatrics	Infant: 1 Month-23 Month	Both	42	Day(s)	56	Day(s)	KEMRI Ahero Clinical Trials Unit. ; KEMRI Kondele Children Hospital ; KEMRI Centre for Respiratory Disease Research ; Kericho Kenya Medical Research Institute United States of Army Medical Research Directorate ; KEMRI Centre for Global Health Research; KEMRI Centre for Clinical Research	IQVIA
A randomized, double-blinded, placebo-controlled, dose-escalation phase 1 clinical trial to evaluate the safety and immunogenicity of recombinant HIV envelope protein BG505 SOSIP.664 gp140 Vaccine, Adjuvanted, in healthy, HIV uninfected adult_x000D_ _x000D_	RCT	Phase-1	2019-03-13	1900-01-01	Recruiting		Infections and Infestations	Adult: 19 Year-44 Year; Middle Aged: 45 Year(s)-64 Year(s); Adolescent: 13 Year-18 Year	Both	18	Year(s)	50	Year(s)	KAVI Institute of Clinical Research ; Seattle HIV Vaccine Trials Unit; Ragon Institute of MGH MIT and Harvard	GlaxoSmithkline Biologicals ; KAVI Institute of Clinical Research ICR; Seattle HIV Vaccine Trials Unit Cabrini ; Ragon Institute of MGH
Effects of contraceptive ring on vaginal microbiota, HIV shedding and local immunity	RCT	Phase-4	2016-06-14	2018-06-25	Completed		Infections and Infestations; Obstetrics and Gynecology	Adult: 19 Year-44 Year	Both	18	Year(s)	40	Year(s)	Thika Partners Study Clinic located in Thika Kenya	Kenya Medical Research Institute; University of Washington
A Randomized Double-blind Placebo-controlled Study to Evaluate the efficacy and Safety of Tocilizumab in Hospitalized Patients with COVID-19 Pneumonia	and stable oxygen saturation on ambient air or >/= 2 liters (L) supplemental oxygen) [ Time Frame: Up to Day 28 ]
AgaKhan University Hospital Nairobi; University of the Free State ; George Provincial Hospital ; Peermed Clinical Trial Centre; Mzansi Ethical Research Centre ; Milpark Hospital; Hospital Militar Central ; Hospital General de Culiacan; Hospital E Maternidade Celso Pierro PUCCAMP; Sentara Medical Group; McAllen Medical Centre; St. Barnabas Hospital; Jamaica Hospital Medical Center; Henry Ford Heal…	Nairobi; Bloemfontain; George; Kempton Park; Middelburg; Parktown West ; Lima; Culiacan; Sao Paolo; Virginia; Texas; New York; New York; Michigan; Florida; California; Arizona	00100; 9301; 6259; 1619; 1055; 2196; 11; 80230; 13060-904; 23462; 78503; 10457; 11418; 48202; 33125; 92243; 85724	254203661097	Nairobi	12137_11432_4737.pdf	Genentech Inc.	San Francisco	; ;	+254733440526; +254203662117; +254780888997	The Atrium Chaka Road ; AgaKhan University Hospital Nairobi 3rd Parklands Avenue off Limuru Road; The Atrium Chaka Road	Nairobi; Nairobi; Nairobi	00100; 00100; 00100	Kenya; Kenya; Kenya	Annual study update
A Phase I Trial of Sevuparin in severe malaria as a potential adjunctive treatment	CCT	Phase-1	1900-01-01	1900-01-01	Not yet recruiting		Infections and Infestations	Infant: 1 Month-23 Month; Preschool Child: 2 Year-5 Year; Child: 6 Year-12 Year	Both	3	Month(s)	12	Year(s)	Kilifi County Hospital KEMRI Wellcome Trust Research Programme
A Phase 2b randomized, open-label, controlled, single center study in Plasmodium falciparum-infected and uninfected adults age 18-55 years old in Kenya to evaluate the efficacy of the delayed, fractional dose RTS,S/AS01E malaria vaccine in subjects treated with artemisinin combination therapy plus primaquine	RCT	Phase-2	2020-11-04	2022-08-17	Completed	N/A	Infections and Infestations	Adolescent: 13 Year-18 Year; Adult: 19 Year-44 Year; Middle Aged: 45 Year(s)-64 Year(s)	Both	18	Year(s)	55	Year(s)	Kombewa Clinical Research Centre	GlaxoSmithKline GSK Biologicals; WRAIR Malaria Serology Reference Center Immunology Core; International AIDS Vaccine Initiative Human Immunology Laboratory IAVI HIL; Kansas State Veterinary Diagnostic Laboratory College of Veterinary Medicine Kansas State University; The Human Immune Monitoring Center HIMC Stanford University; Triclinium Clinical Development Pty Ltd ; Precision for Medicine
A Randomized, Double-Blind Phase 1 Trial to Evaluate the Safety and Immunogenicity of_x000D_ Priming with Env-C Plasmid DNA Vaccine Alone, with Different Adjuvants, or with an_x000D_ Adjuvanted HIV Env gp145 C.6980 Protein Vaccine and Boosting with the Adjuvanted_x000D_ HIV Env gp145 C.6980 Protein Vaccine with or without the Env-C Plasmid DNA Vaccine_x000D_ in Healthy HIV Uninfected Adults in Ke…	RCT	Phase-1	2020-11-27	2023-06-26	Not yet recruiting		Infections and Infestations	Adult: 19 Year-44 Year; Adolescent: 13 Year-18 Year	Both	18	Year(s)	40	Year(s)	KEMRI WRP KERICHO	U.S. Military HIV Research Program
Use of Bexsero immunization to detect cross-reactive antigens and anti-gonococcal antibodies in key populations in Kenya	CCT	Phase-2	1900-01-01	1900-01-01	Active, not recruiting	https://clinicaltrials.gov/ct2/show/NCT04297436	Infections and Infestations	Adult: 19 Year-44 Year	Both	18	Year(s)	25	Year(s)	Kenya Medical Research Institute CGMRC	Prof Christoph Tang
A pilot phase Ib/II study of whole-lung low dose radiation therapy (LDRT) in the treatment of severe Covid 19 pneumonia patients on (or requiring) mechanical ventilatory support. COVID-19	CCT	Phase-2	1900-01-01	1900-01-01	Not yet recruiting		Infections and Infestations	Adult: 19 Year-44 Year; Middle Aged: 45 Year(s)-64 Year(s); Aged: 65+ Year(s); 80 and over: 80+ Year	Both	18	Year(s)	100	Year(s)	AgaKhan University Hospital Nairobi
Malaria as a risk factor for COVID-19 in western Kenya and Burkina Faso	RCT	Phase-3	2021-01-08	1900-01-01	Recruiting		Infections and Infestations; Infections and Infestations	Infant: 1 Month-23 Month; Preschool Child: 2 Year-5 Year; Child: 6 Year-12 Year; Adolescent: 13 Year-18 Year; Adult: 19 Year-44 Year; Middle Aged: 45 Year(s)-64 Year(s); Aged: 65+ Year(s); 80 and over: 80+ Year; New born: 0 Day-1 Month; Infant: 0 Month-23 Month	Both	0	Day(s)	100	Year(s)	Jaramogi Oginga Odinga Teaching and Referral Hospital; Kisumu County Referral Hospital; Ouagadougou Hospitals; Bobo Dioulasso Hospitals	Kenya Medical Research Institute KEMRI; KEMRICDC; US Centers for Disease Control and Prevention CDC; Groupe de Recherche Action en Sante GRAS
Efficacy and Safety of select Flavonoids for the Treatment of Uncomplicated SARS-CoV-2 COVID-19	RCT	Phase-2	1900-01-01	1900-01-01	Not yet recruiting	https://www.sciencedirect.com/science/article/pii/S030698772031358X	Respiratory	Adult: 19 Year-44 Year; Middle Aged: 45 Year(s)-64 Year(s); Aged: 65+ Year(s)	Both	18	Year(s)	80	Year(s)	EMSKE Phytochem designated recruitment centre	KEMRI
Evaluating the provision of clinical and psychosocial outcomes after life-skills provision among perinatally infected adolescents receiving care at Mbagathii Hospital comprehensive care centre li	RCT	Phase-3	2018-12-23	2019-10-31	Active, not recruiting		Infections and Infestations	Adolescent: 13 Year-18 Year	Both	16	Year(s)	19	Year(s)	Mbagathi referral hospital
A Phase III double-blind, randomized, active-comparator controlled study in healthy Kenyan adolescents, young children and infants to assess the safety and immunogenicity of Beijing Institute of Biologic Products (BIBP) yellow fever vaccine in comparison to a WHO 17D-204 prequalified comparator yellow fever vaccine, as well as lot-to-lot consistency of immune response to the BIBP yellow fever vac…	RCT	Phase-3	1900-01-01	1900-01-01	Not yet recruiting		Infections and Infestations	Infant: 1 Month-23 Month; Preschool Child: 2 Year-5 Year; Adolescent: 13 Year-18 Year	Both	9	Month(s)	15	Year(s)	Kenya Medical Research Institute United States Army Medical Research Directorate Africa Kenya	PATH
Efficacy, Immunogenicity, and Safety of SARS-CoV-2 Recombinant Protein Vaccine with Adjuvant in Adults 18 Years of Age and Older. COVID-19_x000D_	RCT	Phase-3	1900-01-01	1900-01-01	Withdrawn		Infections and Infestations	Adult: 19 Year-44 Year; Middle Aged: 45 Year(s)-64 Year(s); Aged: 65+ Year(s); 80 and over: 80+ Year	Both	18	Year(s)	99	Year(s)	CRDC KEMRI; KEMRI USAMRD Africa Kenya; Aga Khan University Hospital; KEMRI CGHR HIVR Division	GlaxoSmithKline
Phase IIa, 90-Day Safety, Adherence, and Acceptability Study of Intravaginal Rings Releasing Tenofovir with and without Levonorgestrel among Women in Western Kenya	RCT	Phase-1	1900-01-01	1900-01-01	Completed		Infections and Infestations; Pregnancy and Childbirth; Obstetrics and Gynecology	Adult: 19 Year-44 Year; Adolescent: 13 Year-18 Year	Female	18	Year(s)	34	Year(s)	Kenya Medical Research Institute Kisumu Clinical Research Site	Kenya Medical Research Institute Center for Global Health Research ; University Of washington; CONRAD
Pharmacokinetic Properties of Antiretroviral and Anti-Tuberculosis Drugs during Pregnancy and Postpartum	CCT	Phase-4	1900-01-01	1900-01-01	Not yet recruiting		Infections and Infestations; Infections and Infestations	New born: 0 Day-1 Month; Adult: 19 Year-44 Year; Middle Aged: 45 Year(s)-64 Year(s); Infant: 0 Month-23 Month; Infant: 1 Month-23 Month; Preschool Child: 2 Year-5 Year; Child: 6 Year-12 Year; Adolescent: 13 Year-18 Year	Both	0	Day(s)	50	Year(s)	KENYA MEDICAL RESEARCH INSTITUTE WALTER REED PROJECT CLINICAL RESEARCH CENTER	Walter Reed Army Institute of Research
A Phase 2a, randomized, blinded, placebo-controlled, multi-center trial to evaluate the safety, tolerability and immunological profile of INO-4700 administered by intradermal (ID) injection followed by electroporation (EP) using the CELLECTRATM 2000 device in healthy adult volunteers	RCT	Phase-2	1900-01-01	1900-01-01	Not yet recruiting	https://clinicaltrials.gov/ct2/show/NCT04588428?cond=MERS&draw=2&rank=8	Other	Adult: 19 Year-44 Year; Middle Aged: 45 Year(s)-64 Year(s); Aged: 65+ Year(s); 80 and over: 80+ Year	Both	18	Year(s)	100	Year(s)	Ahero Clinical Trials Unit; Kenya Medical Research Institute Walter Reed Project KEMRI WRP ; KAVI Institute of Clinical Research	MCT CRO; Coalition for Epidemic Preparedness Innovations CEPI
A Phase 2, Double-Blind, Randomized, Multicenter, Placebo-Controlled Study to Evaluate the Efficacy and Safety of Daily Bedtime TNX-102 SL in Participants with PTSD. (Protocol No. TNX-CY-P308)	RCT	Phase-2	2022-07-01	2023-06-30	Not yet recruiting		Mental and Behavioural Disorders	Adult: 19 Year-44 Year; Middle Aged: 45 Year(s)-64 Year(s); Aged: 65+ Year(s); Adolescent: 13 Year-18 Year	Both	18	Year(s)	75	Year(s)	MOI UNIVERSITY; Kenya Medical Research Institute. KEMRI; Chiromo Lane Medical Centre	Dr. Linet Ongeri ; Dr. Frank Njenga; Dr. Silvia Ongeri; Dr. Edith Kwobah; Prof. Gabriel Kigen; Dr. Bernhards Ogutu
A Phase 3, Multicenter, Randomized, Double-Blind, Placebo-Controlled Trial To Evaluate the Efficacy of Voxelotor for the Treatment of Leg Ulcers in Patients with Sickle cell Disease	RCT	Phase-3	1900-01-01	1900-01-01	Not yet recruiting		Genetic Diseases; Paediatrics	Adolescent: 13 Year-18 Year; Adult: 19 Year-44 Year; Middle Aged: 45 Year(s)-64 Year(s); Aged: 65+ Year(s); 80 and over: 80+ Year	Both	12	Year(s)	100	Year(s)	Strathmore University; Lagos University Teaching Hospital Haematology; Barau Dikko Teaching Hospital Kaduna State University; University of Nigeria; KEMRI CRDR; Haematology and Blood Transfusion Unit Department of Human Pathology; KEMRI CCR Butere County Hospital; Aminu Kano Teaching Hospital; University of Abuja; University of Calabar Teaching Hospital
An open label, phase 2 study to evaluate the safety and immunogenicity of an Ad26.ZEBOV booster dose in Human Immunodeficiency Virus Positive (HIV+) adults previously vaccinated with the Ad26.ZEBOV, MVA-BN-Filo vaccine regimen	CCT	Phase-2	2021-10-06	2021-11-17	Completed		Infections and Infestations	Adult: 19 Year-44 Year; Middle Aged: 45 Year(s)-64 Year(s)	Both	18	Year(s)	60	Year(s)	Kenya AIDS Vaccine Initiative Institute of Clinical Research ; Medical Research Council Uganda Virus Research Institute London School of Hygiene and Tropical Medicine
Dismantling the Shamiri Intervention for Anxiety, Depression, Wellbeing, and Academic Functioning in Kenyan Adolescents: Study Protocol for a Five-Arm Randomized Controlled Trial	RCT	Phase-3	1900-01-01	1900-01-01	Recruiting		Mental and Behavioural Disorders	Adolescent: 13 Year-18 Year; Child: 6 Year-12 Year; Adult: 19 Year-44 Year	Both	12	Year(s)	21	Year(s)	Kahuho Uhuru High School; Bishop Mazzoldi Secondary School; Lenana Secondary School ; Rocks Senior Secondary School Ongata Rongai; Precious Blood Secondary School ; Kanjeru Girls High School; Uthiru Girls High School; Nderi Secondary School; OLM Shauri Moyo; Bibirioni High School; OLM South B; Kenya High School; Nairobi School ; Moi Nairobi Girls School ; Starehe Boys Centre National School; Pang…	Huong Le; Emily Corrigan; Akash Wasil; Katherine Venturo Conerly; Tom Osborn ; John Weisz; Christine Wasanga
TRUE-1: Trial of Repurposed Unithiol for snakebite Envenoming Phase 1 (Safety, Tolerability, Pharmacokinetics and Pharmacodynamics in Healthy Kenyan Adults)	RCT	Phase-1	2022-02-02	1900-01-01	Recruiting	https://wellcomeopenresearch.org/articles/7-90	Injury, Occupational Diseases, Poisoning	Adult: 19 Year-44 Year; Middle Aged: 45 Year(s)-64 Year(s)	Both	18	Year(s)	64	Year(s)	KEMRI Wellcome Trust Research Programme	University of Liverpool
A global multicenter, randomised, double-blind, placebo-controlled, phase III clinical trial to evaluate the efficacy, safety, and immunogenicity of recombinant COVID-19 vaccine (Sf9 cells), for the prevention of COVID-19 in adults aged 18 years and older.	RCT	Phase-3	1900-01-01	1900-01-01	Not yet recruiting		Infections and Infestations	Adult: 19 Year-44 Year; Middle Aged: 45 Year(s)-64 Year(s); Aged: 65+ Year(s)	Both	18	Year(s)	70	Year(s)	KAVI Institute of Clinical Research University of Nairobi; KEMRI Wellcome Trust ; AMPATH Moi University Teaching and Referral Hospital Eldoret	Kenya AIDS Vaccine Initiative KAVI; KEMRI Wellcome Trust ; Moi University Teaching and Referral Hospital and AMPATH
A Randomized, Double-blind, Placebo-controlled, Multicenter Study to Assess the Safety and Efficacy of Inclacumab in Participants with Sickle Cell Disease Experiencing Vaso-occlusive Crises	RCT	Phase-3	1900-01-01	1900-01-01	Recruiting		Haematological Disorders; Infections and Infestations	Adolescent: 13 Year-18 Year; Adult: 19 Year-44 Year; Middle Aged: 45 Year(s)-64 Year(s)	Both	12	Year(s)	65	Year(s)	KEMRI CRDR Siaya Clinical Research Annex; Brigham and Womens Hospital; Cairo University Paediatric Hospital about EL Reesh Hospital; Zagazig University Hospitals; Alexandria University Hospital; Al Kasr Al Ainy Cairo University Hospital; Duke University Medical Center; Indiana Hemophilia and Thrombosis Center; Mersin University Medical Faculty; University of South Alabama Children and Women Hospi…	Dr Miguel Abboud; Dr Maureen Achebe; Dr Almal ElBeshlawy; Dr Mohamed Badr; Dr Hoda Hassab; Dr Mervat Mattar; Dr Nirmish Shah; Dr Sylvain Le Jeune; Dr Brandon Hardesty; Dr Selma Unal; Dr Kenny Galvez; Dr Chibuzo Ilonze; Dr Michael Diamantidis; Dr Antonis Kattamis; Dr Carmen Rosales; Dr Adlette Inati; Dr Hakan Ozdogu; Dr Marla Saenz; Dr Robert Brown; Dr Ali Bulent Antmen; Dr Iheanyi Okpala; Dr Ashr…
Open-label, prospective, single-arm, multi-center study to assess disease activity and biomarker of neuronal damage in minority patients (self-identified Black or African American (AA) and Hispanic/Latino (HA) patients with relapsing multiple sclerosis (RMS) receiving treatment with Ocrelizumab.	CCT	Phase-4	2020-07-30	1900-01-01	Recruiting		Nervous System Diseases	Adult: 19 Year-44 Year; Middle Aged: 45 Year(s)-64 Year(s); Adolescent: 13 Year-18 Year; Aged: 65+ Year(s)	Both	18	Year(s)	65	Year(s)	Aga Khan University Hospital	There are no collaborators
GASTROENTERITIS REHYDRATION OF CHILDREN WITH SEVERE ACUTE MALNUTRITION (GASTRO-SAM).	RCT	Phase-2	2019-08-27	1900-01-01	Active, not recruiting		Infections and Infestations; Paediatrics	Child: 6 Year-12 Year	Both	6	Month(s)	12	Year(s)	Mbale Regional Regional Referral Hospital; Soroti Regional Referral Hospital; Kilifi County Hospital	Peter OlupotOlupot; Mainga Hamaluba; Elizabeth George
A Phase 2 interventional, multicenter, randomized open-label study to determine the effective and tolerable dose of KAF156 and Lumefantrine Solid Dispersion Formulation in combination, given once daily for 1, 2 and 3-days to adults and children with uncomplicated Plasmodium falciparum malaria	RCT	Phase-2	2017-08-02	2021-06-14	Completed	https://clinicaltrials.gov/ct2/show/study/NCT03167242?term=CKAF156A2202&draw=2&rank=1	Infections and Infestations	Aged: 65+ Year(s); 80 and over: 80+ Year; Adolescent: 13 Year-18 Year; Adult: 19 Year-44 Year; Middle Aged: 45 Year(s)-64 Year(s); Preschool Child: 2 Year-5 Year; Child: 6 Year-12 Year	Both	2	Year(s)	80	Year(s)	Institut de Recherche en Science de la Sante; Centre National de Recherche et de Formation sur le Paludisme Niangoloko; Centre National de Recherche et de Formation sur le Paludisme Banfora; Pasteur Institute of Ivory Coast; Pasteur Institute of Ivory Coast Ayame site; Centre de Recherches Medicales de Lambarene CERMEL; MRC Gambia Unit; KEMRI Siaya Clinical Research Annexe; KEMRI Kombewa; Malaria…	Medicines for Malaria Venture MMV
Switching virally suppressed HIV-1 infected elderly adults (age â‰¥ 60 years) without prior confirmed virological failure from current anti-retroviral regimen to bictegravir, emtricitabine and tenofovir alafenamide (B/F/TAF)	RCT	Phase-4	2022-02-01	1900-01-01	Closed to recruitment,follow-up continuing		Infections and Infestations	Middle Aged: 45 Year(s)-64 Year(s); Aged: 65+ Year(s); 80 and over: 80+ Year	Both	60	Year(s)	100	Year(s)	Kenyatta National Hospital; Jaramogi Oginga Odinga Teaching and Referral Hospital	Loice Achieng; Jeremy Penner; Jared Mecha; Anton Pozniak; Sanjay Bhagani; Susan Njogo; Simon Wahome; Sheila Eshiwani; Ruth Wanjohi; Florentius Ndinya; Rukia Aksam; Joseph Nkuranga
Randomized Controlled Trial to Compare the Effect of Corn-Soy Blend + Vegetable Oil and Fish Oil (CSB-VO-FO) With Corn-Soy Blend + Vegetable Oil Alone (CSB-VO) on the Immunological and Microbiota Patterns among Children Aged 9 to 24 months with Moderate Acute Malnutrition (MAM)	RCT	Phase-2	2019-03-01	2020-07-15	Completed		Nutritional, Metabolic, Endocrine	Infant: 1 Month-23 Month	Both	9	Month(s)	24	Month(s)	KEMRI Centre for Clinical Research	University of Texas Medical Branch
A Randomized, Double-blind, Placebo-controlled, Multicenter Study of a Single Dose of Inclacumab to Reduce Re-admission in Participants with Sickle Cell Disease and Recurrent Vaso-occlusive Crises	RCT	Phase-3	1900-01-01	1900-01-01	Recruiting		Haematological Disorders; Infections and Infestations	Adolescent: 13 Year-18 Year; Adult: 19 Year-44 Year; Middle Aged: 45 Year(s)-64 Year(s); Aged: 65+ Year(s); 80 and over: 80+ Year	Both	12	Year(s)	85	Year(s)	KEMRI CRDR Siaya Clinical Research Annex; Hospital Henri Mondor; American University of Beirut Medical Center; St Jude Childrens Research Hospital; Cairo University Paediatric Hospital abou El Reesh Hospital; Zagazig University Hospitals; Alexandria University Hospital; Al Kasr Al Ainy Cairo University Hospital; Hospital Santa Marcelina; University of Illinois at Chicago; Duke University Medical …
Safety and immunogenicity of a travalent bioconjugate vaccine Shigella -: A phase1/2 randomized controlled and aged escending study including dose finding in 9 month old infants	RCT	Phase-1	2019-09-02	2022-07-31	Recruiting		Infections and Infestations	Infant: 1 Month-23 Month; Preschool Child: 2 Year-5 Year; Adult: 19 Year-44 Year; Middle Aged: 45 Year(s)-64 Year(s)	Both	8	Month(s)	50	Year(s)	Kenya Medical Research Institute (KEMRI)/ United States Army Medical Research Directorate- Kenya (USAMRD-K)
A randomized, double-blind, placebo-controlled, multicenter study of ensovibep (MP0420) in ambulatory adult patients with symptomatic COVID-19 â€“ The â€œEMPATHYâ€ Trial	RCT	Phase-2	1900-01-01	2022-06-30	Stopped early/ terminated		Infections and Infestations	Adult: 19 Year-44 Year; Middle Aged: 45 Year(s)-64 Year(s); Aged: 65+ Year(s); 80 and over: 80+ Year	Both	18	Year(s)	80	Year(s)	Kenyatta University Teaching Referral and Research Hospital KUTRRH; Kenya Medical Research Institute US Army Medical Research Directorate Kericho; Kenya Medical Research Institute US Army Medical Research Directorate Kisumu Field Station; KEMRI Centre for Respiratory Disease Research CRDR Kenyatta National Hospital; Victoria Biomedical Research Institute VIBRI	Novartis Pharma AG; Quintiles East Africa Limited IQVIA
An Open-label Extension Study to Evaluate the Long-term Safety of Inclacumab Administered to Participants with Sickle Cell Disease Who Have Participated in an Inclacumab Clinical Trial	CCT	Phase-3	1900-01-01	1900-01-01	Recruiting		Haematological Disorders; Infections and Infestations	Adult: 19 Year-44 Year; Middle Aged: 45 Year(s)-64 Year(s); Adolescent: 13 Year-18 Year; Aged: 65+ Year(s); Child: 6 Year-12 Year; 80 and over: 80+ Year	Both	12	Year(s)	85	Year(s)	KEMRI CRDR SIAYA Clinical Research Annex; National Hospital Abuja; American University of Beirut Medical Center; Hospital Henri Mondor; Dana Farber Cancer Institute; St Jude Childrens Research Hospital; Cukurova University Medical Faculty Balcali Hospital; University of South Florida; Zagazig University Hospitals; Al Kasr Al Ainy Cairo University Hospital; University of Illinois at Chicago; Ain S…
A Phase 1b, open-label, age de-escalation, dose-escalation study to evaluate the safety and immunogenicity of different doses of a candidate malaria vaccine; adjuvanted R21(R21/MM) in adults, young children and infants in Kilifi, Kenya.	RCT	Phase-1	2019-04-28	2022-07-31	Closed to recruitment,follow-up continuing		Infections and Infestations	Infant: 0 Month-23 Month; Infant: 1 Month-23 Month; Preschool Child: 2 Year-5 Year; Adult: 19 Year-44 Year; Middle Aged: 45 Year(s)-64 Year(s)	Both	5	Month(s)	45	Year(s)	KEMRI WELLCOME TRUST RESEARCH PROOGRAMME CENTRE FOR GEOGRAPHIC MEDICINE COAST
ACTION III: A multi-country, multi-centre, three-arm, parallel group, double-blind, placebo-controlled, randomized trial of two doses of antenatal corticosteroids for women with a high probability of birth in the late preterm period in hospitals in low-resource countries to improve newborn outcomes	RCT	Phase-4	1900-01-01	1900-01-01	Not yet recruiting		Obstetrics and Gynecology	Adult: 19 Year-44 Year; Adolescent: 13 Year-18 Year; Middle Aged: 45 Year(s)-64 Year(s)	Female	16	Year(s)	49	Year(s)	Coast General Teaching and Referral Hospital; Thika Level 5 Hospital; Nakuru level 5 hospital	University of Nairobi
Childrenâ€™s Oxygen Administration Strategies Trial and Nutrition	RCT	Phase-2	2018-08-10	1900-01-01	Recruiting		Respiratory; Paediatrics	Infant: 1 Month-23 Month; Preschool Child: 2 Year-5 Year; Child: 6 Year-12 Year	Both	6	Month(s)	12	Year(s)	Mbale Regional Referral Hospital; Soroti Regional Referral Hospital; Jinja Regional Referral Hospital; Kilifi County Hospital
Safety, immunogenicity, and efficacy of R21/Matrix M (R21/MM) and ChAd63/MVA-ME-TRAP in the context of controlled human malaria infection: A Phase IIb Trial in Kenyan Adults.	RCT	Phase-2	1900-01-01	1900-01-01	Not yet recruiting		Infections and Infestations	Adolescent: 13 Year-18 Year; Adult: 19 Year-44 Year; Middle Aged: 45 Year(s)-64 Year(s)	Both	18	Year(s)	45	Year(s)	KEMRI WELLCOME TRUST RESEARCH PROGRAMME	The Jenner Institute
Safety and feasibility of a malaria transmission model in semi-immune Kenyan adults using Plasmodium falciparum sporozoites	RCT	Phase-1	1900-01-01	1900-01-01	Not yet recruiting		Infections and Infestations	Adolescent: 13 Year-18 Year; Adult: 19 Year-44 Year; Middle Aged: 45 Year(s)-64 Year(s)	Both	18	Year(s)	45	Year(s)	KEMRI Wellcome Trust Research Programme	Sanaria Inc
Supportive Care and Antibiotics for Severe Pneumonia among Hospitalised Children (SEARCH): A Pragmatic Randomised Controlled Trial	RCT	Phase-3	2019-08-01	1900-01-01	Active, not recruiting		Paediatrics	Infant: 1 Month-23 Month; Preschool Child: 2 Year-5 Year	Both	2	Month(s)	59	Month(s)	Bungoma County Referral Hospital ; Busia County Hospital ; Embu Level 5 Hospital ; Kakamega County Teaching and Referral Hospital ; Kiambu County Referral Hospital ; Kisumu County Hospital ; Kitale County Referral Hospital; Mama Lucy Kibaki Hospital ; Machakos Level 5 Hospital ; Naivasha County Referral Hospital	University of Nairobi ; London School of Hygiene and Tropical Medicine ; Medical Research Council ; Ministry of Health Kenya ; Wellcome Trust ; Department for International Development United Kingdom ; National Institute for Health Research United Kingdom
A 3-Arm, Randomized, Blinded, Active-Controlled, Phase II Study of RO7121661, a PD1-TIM3 Bispecific Antibody and RO7247669, a PD1-LAG3 Bispecific Antibody, Compared With Nivolumab in Participants With Advanced or Metastatic Squamous Cell Carcinoma of the Esophagus	RCT	Phase-2	1900-01-01	1900-01-01	Not yet recruiting		Cancer	Adult: 19 Year-44 Year; Middle Aged: 45 Year(s)-64 Year(s); Aged: 65+ Year(s); 80 and over: 80+ Year	Both	18	Year(s)	80	Year(s)	Aga Khan University Hospital; International Cancer Institute
A Randomized, Double-Blind, Placebo-Controlled, Phase III Study to Evaluate the Safety and Efficacy of Aerosolized Novaferon + SOC vs. Placebo + SOC in Hospitalized Adult Patients with Moderate to Severe COVID-19	RCT	Phase-3	1900-01-01	1900-01-01	Not yet recruiting		Respiratory	Adolescent: 13 Year-18 Year; Adult: 19 Year-44 Year; Middle Aged: 45 Year(s)-64 Year(s); Aged: 65+ Year(s); 80 and over: 80+ Year	Both	18	Year(s)	105	Year(s)	CREATES Strathmore University Medical Centre; KEMRI Kericho
A Phase III, Randomized, Open-label, Multicenter Study Evaluating The Efficacy And Safety Of Adjuvant Giredestrant Compared With Physician's Choice Of Adjuvant Endocrine Monotherapy In Patients With Estrogen Receptor-Positive, HER2-Negative Early Breast Cancer_x000D_ _x000D_	RCT	Phase-3	1900-01-01	1900-01-01	Not yet recruiting		Cancer	Adult: 19 Year-44 Year; Middle Aged: 45 Year(s)-64 Year(s); Aged: 65+ Year(s); 80 and over: 80+ Year	Both	18	Year(s)	100	Year(s)	Sandton Oncology Medical Group ; Cape Town Oncology Trials; Eastleigh Breast Care Centre; WITS Clinical Research Site PPDS; Wilgers Oncology Centre; Excellentis Clinical Trial Consultants; Merc SiReN Medinova Clinical Research; West Rand Oncology Centre; Dr Schnetler Corbett and Partners; Langenhoven Drive Oncology Centre; St Francis Hospital Nsambya; Uganda Cancer Institute; Mediheal Group of Ho…
Phase 3 Study of Immunogenicity and Safety of Adjuvanted SARS-CoV-2 (SCB 2019) Vaccine in Healthy Adults and Individuals with HIV Infection_x000D_	RCT	Phase-3	1900-01-01	1900-01-01	Not yet recruiting		Infections and Infestations
effects of covi soup on health and nutrition status of patients living with both diabetes type 2 and hypertension in kakamega	RCT	Phase-1	2021-06-01	2021-08-31	Completed		Nutritional, Metabolic, Endocrine	Adult: 19 Year-44 Year; Middle Aged: 45 Year(s)-64 Year(s)	Both	30	Year(s)	70	Year(s)	Kakamega county general hospital
A Phase 3 Multicenter, Observer Blind, Randomized, Controlled Study to Evaluate Safety (Ages 6 Months to 45 Years) and Non-inferiority (Ages 9-12 Months) of Multi-dose and Single-dose Vial Formulations of EuTCV (Vi-CRM197 Typhoid Conjugate Vaccine) against Typbar TCVÂ® and Lot-to-Lot Consistency of the Immune Response (Ages 9-12 Months) to Multi-dose Vial Formulation EuTCV in Healthy African Part…	RCT	Phase-3	1900-01-01	1900-01-01	Recruiting	https://pactr.samrc.ac.za/	Infections and Infestations; Paediatrics	Infant: 1 Month-23 Month; Adult: 19 Year-44 Year; Preschool Child: 2 Year-5 Year; Child: 6 Year-12 Year; Adolescent: 13 Year-18 Year	Both	6	Month(s)	45	Year(s)	Kenya Medical Research Institute Kericho ; IRESSEF Institut de Recherche en Sante de Surveillance Epidemiologique et de Formation	PATH Center for Vaccine Innovation and Access CVIA
Piloting HIV Pre-exposure Prophylaxis (PrEP) Integration into Services for Early Pregnancy Loss	RCT	Phase-4	1900-01-01	1900-01-01	Recruiting		Infections and Infestations	Adolescent: 13 Year-18 Year; Adult: 19 Year-44 Year	Female	15	Year(s)	30	Year(s)	KEMRI RCTP KISUMU SITE; Partners in Health Research and Development Thika
Non- inferiority fractional-doses trial for yellow fever vaccine	RCT	Phase-4	2019-11-15	1900-01-01	Closed to recruitment,follow-up continuing		Infections and Infestations	Infant: 1 Month-23 Month; Adult: 19 Year-44 Year; Middle Aged: 45 Year(s)-64 Year(s); Infant: 0 Month-23 Month; Preschool Child: 2 Year-5 Year; Child: 6 Year-12 Year; Adolescent: 13 Year-18 Year	Both	9	Month(s)	60	Year(s)	Kenya Wellcome Trust Research Program Centre for Geographic Medicine Coast ; Epicentre Mbarara Research Centre	Institute Pastuer Dakar; Uganda National Health Research Organization; Epicentre France
A PHASE II/III MULTICENTER STUDY EVALUATING THE EFFICACY AND SAFETY OF MULTIPLE TARGETED THERAPIES AS TREATMENTS FOR PATIENTS WITH ADVANCED OR METASTATIC NON-SMALL CELL LUNG CANCER (NSCLC) HARBORING ACTIONABLE SOMATIC MUTATIONS DETECTED IN BLOOD (BFAST: BLOOD FIRST ASSAY SCREENING TRIAL)	CCT	Phase-2	1900-01-01	1900-01-01	Recruiting	https://www.clinicaltrials.gov/ct2/show/NCT03178552	Cancer	Adult: 19 Year-44 Year; Middle Aged: 45 Year(s)-64 Year(s); Aged: 65+ Year(s); 80 and over: 80+ Year	Both	18	Year(s)	100	Year(s)	Aga Khan University Hospital Nairobi
A Pragmatic Randomized Controlled Trial of Standard Care versus Steroids plus Standard Care for Treatment of Pneumonia in Adults Admitted to Kenyan Hospitals	RCT	Phase-4	2022-04-18	2022-11-01	Not yet recruiting	Https://wellcome.ac.uk/grant-funding/guidance/data software-material-management-and-sharing-policy	Infections and Infestations; Respiratory	Adult: 19 Year-44 Year; Adolescent: 13 Year-18 Year; Middle Aged: 45 Year(s)-64 Year(s); Aged: 65+ Year(s); 80 and over: 80+ Year	Both	18	Year(s)	80	Year(s)	KEMRI
Validation of Chloe SED, a reusable, low-cost syringe extension device for the provision of paracervical analgesia during gynecologic procedures	RCT	Phase-3	1900-01-01	1900-01-01	Not yet recruiting		Obstetrics and Gynecology	Adult: 19 Year-44 Year; Adolescent: 13 Year-18 Year; Middle Aged: 45 Year(s)-64 Year(s)	Female	18	Year(s)	60	Year(s)	Jaramogi Oginga Odinga Teaching and Referral Hospital; Kisii Teaching and Referral Hospital
Evaluating the combined use of NOn-invasive Ventilation alongside preventative anticonvulsant treatment In children presenting to hospital with CErebral_Malaria and convulsions: a phase I trial	CCT	Phase-1	2020-02-03	1900-01-01	Recruiting		Infections and Infestations	Infant: 1 Month-23 Month; Preschool Child: 2 Year-5 Year; Child: 6 Year-12 Year	Both	3	Month(s)	12	Year(s)	Kilifi Country Hospital
A randomized, double- blind, placebo-controlled, multicenter trial, assessing the impact of inclisiran on major adverse cardiovascular events in participants with established cardiovascular disease (VICTORION-2 PREVENT)	RCT	Phase-3	2021-11-23	1900-01-01	Recruiting		Circulatory System; Cardiology	Middle Aged: 45 Year(s)-64 Year(s); Aged: 65+ Year(s); 80 and over: 80+ Year	Both	40	Year(s)	120	Year(s)	The Karen Hospital; Creates Strathmore University
A Phase 2/3, Double-Blind, Randomized, Placebo-Controlled, Multicenter Study to Evaluate the Efficacy and Safety of Mitapivat in Subjects With Sickle Cell Disease, Study AG348-C-020. _x000D_	RCT	Phase-2	1900-01-01	1900-01-01	Not yet recruiting		Haematological Disorders	Adolescent: 13 Year-18 Year; Adult: 19 Year-44 Year; Middle Aged: 45 Year(s)-64 Year(s); Aged: 65+ Year(s); 80 and over: 80+ Year	Both	16	Year(s)	90	Year(s)	Gertrudes Childrens Hospital ; KEMRI Centre for clinical Research Butere County Hospital ; Kenya Medical Research Institute ; KEMRI CRDR Clinical Research Nairobi; Strathmore University ; KEMRI CRDR Siaya Clinical Research Annex; KEMRI USAMRU; Lagos University Teaching Hospital ; University of Nigeria Teaching Hospital; University of Abuja Teaching Hospital; National Hospital Abuja ; Barau Dikko …
Simplified Treatment for Eclampsia Prevention using Magnesium sulfate: A phase III, randomized, open label, active-controlled, multicountry, multicentre, non-inferiority trial of simplified magnesium sulfate regimen for eclampsia prophylaxis.	RCT	Phase-3	1900-01-01	1900-01-01	Not yet recruiting		Pregnancy and Childbirth; Obstetrics and Gynecology	Adult: 19 Year-44 Year	Female	16	Year(s)	49	Year(s)	Nakuru Level 5 Hospital; Mama Lucy Hospital; Naivasha District Hospital
A Multi-Centre, Randomized, Double Blind, Phase 2b Trial to Evaluate the Safety and Immunogenicity of Janssen Ad26COVS1 and Novavax NVX-CoV2373 COVID-19 vaccines for Homologous and Heterologous Boosting in Adolescents and Adults Aged 12 to 64 Years with and without HIV infection in 3 African Countries (Kenya, Democratic Republic of Congo, and Rwanda).	RCT	Phase-2	2022-05-18	1900-01-01	Recruiting		Infections and Infestations	Adolescent: 13 Year-18 Year; Adult: 19 Year-44 Year; Middle Aged: 45 Year(s)-64 Year(s)	Both	12	Year(s)	64	Year(s)	Victoria Biomedical Research Institute; University of Kinshasa; Rinda Ubuzima	Coalition for Epidemic Preparedness Innovations; Africa Clinical Research Management Ltd ; Vincent Mutabazi; Hypolite Muhindo
A PHASE III, RANDOMIZED, DOUBLE-BLIND, PLACEBO-CONTROLLED CLINICAL TRIAL TO EVALUATE THE EFFICACY AND SAFETY OF ADJUVANT ATEZOLIZUMAB OR PLACEBO AND TRASTUZUMAB EMTANSINE FOR HER2-POSITIVE BREAST CANCER AT HIGH RISK OF RECURRENCE FOLLOWING PREOPERATIVE THERAPY	RCT	Phase-3	1900-01-01	1900-01-01	Active, not recruiting		Cancer	Adult: 19 Year-44 Year; Middle Aged: 45 Year(s)-64 Year(s); Aged: 65+ Year(s); 80 and over: 80+ Year	Both	18	Year(s)	100	Year(s)	Aga Khan University Hospital Nairobi; International Cancer Institute; Uganda Cancer Institute	IQVIA
A PHASE III, RANDOMIZED, DOUBLE-BLIND, PLACEBO-CONTROLLED STUDY OF ATEZOLIZUMAB WITH OR WITHOUT TIRAGOLUMAB (ANTI-TIGIT ANTIBODY) IN PATIENTS WITH UNRESECTABLE ESOPHAGEAL SQUAMOUS CELL CARCINOMA WHOSE CANCERS HAVE NOT PROGRESSED FOLLOWING DEFINITIVE CONCURRENT CHEMORADIOTHERAPY
Safety and Pharmacokinetics of TAF-FTC Pre-Exposure Prophylaxis in Kenyan Cisgender women- of TDF-FTC Pre-exposure Prophylaxis in Kenyan Cisgender women.	RCT	Phase-2	1900-01-01	1900-01-01	Not yet recruiting		Infections and Infestations	Adult: 19 Year-44 Year	Female	18	Year(s)	30	Year(s)	KEMRI PHRD THIKA
A PHASE Ia/Ib DOSE-ESCALATION AND DOSE- EXPANSION STUDY EVALUATING THE SAFETY, PHARMACOKINETICS, AND ACTIVITY OF GDC-6036 AS A SINGLE AGENT AND IN COMBINATION WITH OTHER ANTI-CANCER THERAPIES IN PATIENTS WITH ADVANCED OR METASTATIC SOLID TUMORS WITH A KRAS G12C MUTATION	CCT	Phase-1	1900-01-01	1900-01-01	Not yet recruiting		Cancer	Adult: 19 Year-44 Year	Both	18	Year(s)	80	Year(s)	Aga Khan University Hospital Nairobi
Evaluation of an audit and feedback intervention to Reduce Gentamicin Prescription Errors in Newborn Treatment (ReGENT) in neonatal inpatient care in Kenya: A controlled interrupted time series study protocol	RCT	Phase-1	1900-01-01	1900-01-01	Active, not recruiting		Other	New born: 0 Day-1 Month	Both	0	Day(s)	28	Day(s)	KEMRI Wellcome Trust Research Programme
A staged Phase I/II observer-blind, randomised, controlled, multi-country study to evaluate the safety, reactogenicity, and immune responses to the GVGH altSonflex1-2-3 vaccine against S. sonnei and S. flexneri, serotypes 1b, 2a, and 3a, in adults in Europe (Stage 1) followed by age de-escalation from adults to children and infants, and dose-finding in infants in Africa (Stage 2)_x000D_ _x000D_	RCT	Phase-2	2021-10-06	1900-01-01	Recruiting		Infections and Infestations	Infant: 1 Month-23 Month; Preschool Child: 2 Year-5 Year; Adult: 19 Year-44 Year; Middle Aged: 45 Year(s)-64 Year(s)	Both	9	Month(s)	50	Year(s)	Centrum Voor Vaccinologie; Kenya Medical research Institute KEMRI United States Army Medical Research Directorate Africa Kenya MRD AK	US Department of Defence Walter Reed Army Institute of Research
A Phase 2a Randomized, Double-Blind, Placebo-Controlled Study to Characterize the Pharmacokinetics and Pharmacodynamics of Rifaximin Novel Formulations in Patients with Sickle Cell Disease	RCT	Phase-2	1900-01-01	1900-01-01	Not yet recruiting		Haematological Disorders	Adolescent: 13 Year-18 Year; Adult: 19 Year-44 Year; Middle Aged: 45 Year(s)-64 Year(s); Aged: 65+ Year(s)	Both	18	Year(s)	70	Year(s)	Victoria Biomedical Research Institute; CREATES Strathmore University Medical Centre; KEMRI Kombewa; International Cancer Institute
A Randomized, Observer-Blind, Dose-Escalation, Placebo-Controlled Phase 1 Clinical Trial of COVAC-1 in Generally Healthy Adults	RCT	Phase-1	2022-04-14	2023-08-15	Not yet recruiting		Infections and Infestations; Respiratory; Other	Adult: 19 Year-44 Year	Both	18	Year(s)	54	Year(s)	Kenya AIDS Vaccine Initiative Institute of Clinical Research
A Phase III, Multicenter, Double blind, Randomized Study of SII Yellow Fever Vaccine to Compare Safety and Immunogenicity with STAMARIL	RCT	Phase-3	1900-01-01	1900-01-01	Not yet recruiting		Infections and Infestations	Infant: 1 Month-23 Month; Preschool Child: 2 Year-5 Year; Child: 6 Year-12 Year; Adolescent: 13 Year-18 Year; Adult: 19 Year-44 Year; Middle Aged: 45 Year(s)-64 Year(s); Infant: 1 Month-23 Month; Preschool Child: 2 Year-5 Year; Child: 6 Year-12 Year; Adolescent: 13 Year-18 Year; Adult: 19 Year-44 Year; Middle Aged: 45 Year(s)-64 Year(s)	Both; Both	1	Year(s)	60	Year(s)	Kenya Medical Research Institute Centre for Research Disease Research CRDR; Kisumu County Referral Hospital
A Single Arm, Open Label, Phase 1/2 Study to Evaluate the Pharmacokinetics and Safety of Etavopivat in Pediatric Patients with Sickle Cell Disease	CCT	Phase-2	1900-01-01	1900-01-01	Not yet recruiting		Haematological Disorders	Child: 6 Year-12 Year; Adolescent: 13 Year-18 Year	Both	12	Year(s)	18	Year(s)	University of Nigeria Hematology Department; Lagos University Teaching Hospital; Ahero Clinical Trials Unit; KEMRI Kombewa; KEMRI Walter Reed Kericho ; Aminu Kano Teaching Hospital	IQVIA
Safety and Efficacy of L9LS, a Human Monoclonal Antibody Against Plasmodium falciparum, in an Age De-Escalation, Dose-Escalation Trial and a Randomized, Placebo-Controlled, Double-Blind Trial of Children in Western Kenya	RCT	Phase-2	1900-01-01	1900-01-01	Recruiting		Infections and Infestations	Infant: 1 Month-23 Month; Preschool Child: 2 Year-5 Year; Child: 6 Year-12 Year	Both	5	Month(s)	10	Year(s)	Siaya County Referral Hospital; Kogelo Dispensary for part 2	Centers for Disease Control and Prevention; Liverpool School of Tropical Medicine and Hygiene
A Multisectoral Strategy to Address Persistent Drivers of the HIV Epidemic in East Africa (SAPPHIRE)	RCT	Phase-4	1900-01-01	1900-01-01	Recruiting		Infections and Infestations	Adolescent: 13 Year-18 Year; Adult: 19 Year-44 Year	Both	15	Year(s)	25	Year(s)	BM1 ICIPE Complex	Kenya Medical Research Institute
A RANDOMIZED, DOUBLE-BLIND, PLACEBO-CONTROLLED STUDY TO INVESTIGATE THE EFFICACY OF FENEBRUTINIB IN RELAPSING MULTIPLE SCLEROSIS	RCT	Phase-2	1900-01-01	1900-01-01	Not yet recruiting	URL	Nervous System Diseases	Adult: 19 Year-44 Year; Middle Aged: 45 Year(s)-64 Year(s)	Both	18	Year(s)	55	Year(s)	Aga Khan University Nairobi
An open-label randomised controlled trial comparing novel combination and currently used antibiotic regimens for the empiric treatment of neonatal sepsis with a run-in confirmatory pharmacokinetic phase: NeoSep01	RCT	Phase-4	1900-01-01	1900-01-01	Not yet recruiting		Neonatal Diseases	New born: 0 Day-1 Month	Both	1	Day(s)	28	Day(s)	Kilifi County Hospital; Chris Hani Baragwanath Academic Hospital ; Tygerberg Childrens Hospital Stellenbosch University	MRC Clinical Trials Unit at UCL; St Georges University of London ; University of Antwerp
Capacity building as a means of increasing uptake of sexual and reproductive health and rights Services among adolescent and young key populations in Nairobi County.	RCT	Phase-1	2022-05-02	2022-10-31	Completed		Infections and Infestations; Infections and Infestations	Adolescent: 13 Year-18 Year; Adult: 19 Year-44 Year	Both	15	Year(s)	24	Year(s)	Nairobi County
A Phase IIb, Multicenter, Observer-Blinded, Randomized, Placebo-Controlled Trial to Evaluate the Immunogenicity and Safety of the AdCLD-CoV19-1 in Healthy Adults Aged 19 Years Old and Above	RCT	Phase-2	2022-11-21	2024-03-21	Active, not recruiting		Infections and Infestations	Adult: 19 Year-44 Year; Middle Aged: 45 Year(s)-64 Year(s); Aged: 65+ Year(s); 80 and over: 80+ Year	Both	18	Year(s)	99	Year(s)	Ifakara Health Institute; NIMR MBEYA MEDICAL RESEARCH CENTER ; Kenya Medical Research Institute Walter Reed Project Kericho
Enhancing PrEP outcomes among Kenyan adolescent girls and young women with a novel pharmacy-based PrEP delivery platform	RCT	Phase-4	1900-01-01	1900-01-01	Not yet recruiting		Infections and Infestations	Adolescent: 13 Year-18 Year; Adult: 19 Year-44 Year	Female	14	Year(s)	25	Year(s)	Kenya Medical Research Institute Research Care and Training Programme	Kenya Medical Research Institute
Optimizing nutrient requirement for maternal supplementation among women of reproductive age in Kenya	RCT	Phase-2	1900-01-01	1900-01-01	Not yet recruiting		Nutritional, Metabolic, Endocrine	Adult: 19 Year-44 Year	Female	18	Year(s)	35	Year(s)	KEMRI Wellcome Trust Research Programme
A PHASE IIIB, MULTINATIONAL, MULTICENTER, RANDOMIZED, OPEN-LABEL STUDY TO EVALUATE PATIENT PREFERENCE FOR HOME ADMINISTRATION OF FIXED-DOSE COMBINATION OF PERTUZUMAB AND TRASTUZUMAB FOR SUBCUTANEOUS ADMINISTRATION IN PARTICIPANTS WITH EARLY OR LOCALLY ADVANCED/ INFLAMMATORY HER2-POSITIVE BREAST CANCER	RCT	Phase-3	2023-02-09	1900-01-01	Recruiting		Cancer	Adult: 19 Year-44 Year; Middle Aged: 45 Year(s)-64 Year(s); Aged: 65+ Year(s); 80 and over: 80+ Year	Both	18	Year(s)	100	Year(s)	Aga Khan University; International Cancer Institute
A two-year, phase III randomized, double-blind, parallel-group, placebo-controlled trial to evaluate the safety, efficacy, and tolerability of 300 mg s.c. secukinumab versus placebo, in combination with SoC therapy, in patients with active lupus nephritis	RCT	Phase-3	2020-07-07	1900-01-01	Recruiting		Other	Adult: 19 Year-44 Year; Middle Aged: 45 Year(s)-64 Year(s)	Both	18	Year(s)	75	Year(s)	Aga Khan University Clinical Research Unit; Oak Tree Centre for Kidney and Chronic Diseases
Efficacy and safety of Artesunate plus sulfalene/pyrimethamine combined with praziquantel for treatment of children with Schistosoma mansoni or Schistosoma haematobium in Homabay County, Kenya	RCT	Phase-3	2014-09-11	2015-10-23	Completed		Infections and Infestations	Child: 6 Year-12 Year; Adolescent: 13 Year-18 Year	Both	6	Year(s)	15	Year(s)	Rachuonyo division; Migori County
Integrating Tobacco use cessation into HIV Care and Treatment Clinics in Ministry of Health Facilities in Kisumu County, Kenya.	RCT	Phase-4	1900-01-01	1900-01-01	Not yet recruiting		Infections and Infestations	Adult: 19 Year-44 Year; Middle Aged: 45 Year(s)-64 Year(s)	Both	18	Year(s)	65	Year(s)	Kenya Medical Research Institute RCTP	Kenya Medical Research Institute
A PHASE III, RANDOMIZED, OPEN-LABEL STUDY EVALUATING THE EFFICACY AND SAFETY OF GIREDESTRANT IN COMBINATION WITH PHESGO VERSUS PHESGO AFTER INDUCTION THERAPY WITH PHESGO+TAXANE IN PATIENTS WITH PREVIOUSLY UNTREATED HER2-POSITIVE, ESTROGEN RECEPTOR-POSITIVE LOCALLY-ADVANCED OR METASTATIC BREAST CANCER	RCT	Phase-3	1900-01-01	1900-01-01	Recruiting		Cancer	Adult: 19 Year-44 Year; Middle Aged: 45 Year(s)-64 Year(s); Aged: 65+ Year(s); 80 and over: 80+ Year	Both	18	Year(s)	100	Year(s)	Aga Khan University Hospital; International Cancer Institute; International Cancer Institute
A Phase 2/3, Randomized, Observer-Blind, Placebo-Controlled, Study to Evaluate the Safety, Reactogenicity, and Effectiveness of mRNA-1273 SARS-CoV-2 Vaccine in Healthy Adolescents 12 to < 18 years of age	RCT	Phase-2	1900-01-01	1900-01-01	Not yet recruiting		Respiratory	Adolescent: 13 Year-18 Year	Female	12	Year(s)	18	Year(s)	KEMRI CRDR Clinical Research Clinic Nairobi; Kenya Medical Research Institute Kisumu; Kenya Aids Vaccine Initiative kavi; Kenya Medical Research Institute CMR Kargeno Research and Policy Hub; Kenya Medical Research Institute Walter Reed Project Clinical Research Center KEMRI WRP CRS; Victoria Biomedical Research Institute VIBRI; Kenya Medical Research Institute
A Phase III Multicenter Randomized, Double-Blind, Double-Dummy, Parallel-Group Study To Evaluate The Efficacy And Safety Of Fenebrutinib Compared With Teriflunomide In Adult Patients With Relapsing Multiple Sclerosis	RCT	Phase-3	1900-01-01	1900-01-01	Recruiting		Nervous System Diseases	Adult: 19 Year-44 Year; Middle Aged: 45 Year(s)-64 Year(s)	Both	18	Year(s)	55	Year(s)	Aga Khan University Hospital Nairobi
A PHASE II/III, RANDOMIZED, DOUBLE BLIND, PLACEBO CONTROLLED STUDY OF TIRAGOLUMAB IN COMBINATION WITH ATEZOLIZUMAB PLUS PEMETREXED AND CARBOPLATIN/CISPLATIN_x000D_ VERSUS PEMBROLIZUMAB PLUS PEMETREXED AND CARBOPLATIN/CISPLATIN IN PATIENTS WITH PREVIOUSLY UNTREATED ADVANCED NON-SQUAMOUS NON-SMALL-CELL LUNG CANCER	RCT	Phase-3	1900-01-01	1900-01-01	Recruiting	https://clinicaltrials.gov/ct2/show/NCT04619797	Cancer	Adult: 19 Year-44 Year; Middle Aged: 45 Year(s)-64 Year(s); Aged: 65+ Year(s); 80 and over: 80+ Year	Both	18	Year(s)	100	Year(s)	International Cancer Institute
Long-Acting Treatment in Adolescents (LATA): A randomised open-label 2-arm 96 week trial in virologically suppressed HIV-1-positive adolescents aged 12-19 years of age in Sub-Saharan Africa	RCT	Phase-3	1900-01-01	1900-01-01	Not yet recruiting		Infections and Infestations	Child: 6 Year-12 Year; Adolescent: 13 Year-18 Year; Adult: 19 Year-44 Year	Both	12	Year(s)	19	Year(s)	Baylor College; Joint Clinical Research Centre; University of Zimbabwe Clinical Research Centre; Moi University; Durban International Clinical Research Site Enhancing Care Foundation	University Medical Centre St Radboud; Baylor College; Joint Clinical Research Centre; University of Zimbabwe; Moi University; Radboud University Medical Center; London School of Hygiene and Tropical Medicine ; University of York; Enhancing Care Foundation NPC; Fondazione PENTA ONLUS; Uganda Virus Research Institute ; Africa Health Research Institute ; University College London

## Sheet: Infant clinical trials
OfficialScientificTitle	TrialType	TrialPhase	ActualStartDate	CompletionDate	RecruitmentStatus	PublicationURL	Diseases	AgeGroup	Gender	MinAge	MinAgeType	MaxAge	MaxAgeType	RecruitmentCentreName	CollaboratorName	Institution
Effect of Umbilical Cord Milking versus Delayed Cord Clamping on Selected Hematological and Clinical Parameters in Preterm Neonates at Kenyatta National Hospital: A Randomized Controlled Trial. .	RCT	Phase-3	1900-01-01	1900-01-01	Completed		Other	New born: 0 Day-1 Month; Middle Aged: 45 Year(s)-64 Year(s); Infant: 0 Month-23 Month; Infant: 1 Month-23 Month; Preschool Child: 2 Year-5 Year; Child: 6 Year-12 Year; Adolescent: 13 Year-18 Year; Adult: 19 Year-44 Year	Both	0	Day(s)	64	Year(s)	kenyatta national hospital	Dr Alfred Osoti
Open-label, Phase 3 efficacy and safety study of L-praziquantel orodispersible tablets (L-PZQ ODT) in Schistosoma-infected children 3 months to 6 years of age, including a 2:1 randomized, controlled cohort of Schistosoma mansoni-infected children 4 to 6 years of age treated with L-PZQ ODT or commercial PZQ (BiltricideÂ®).	RCT	Phase-3	2020-09-02	2021-08-07	Completed		Infections and Infestations	Infant: 1 Month-23 Month; Preschool Child: 2 Year-5 Year; Child: 6 Year-12 Year	Both	3	Month(s)	6	Year(s)	Regional Hospital CHR de Man; Homa Bay County Teaching and Referral Hospital	Merck KGaA; Astellas Pharma Inc.; Swiss Tropical and Public Health Institute; Farmanguinhos; Schistosomiasis Control Initiative; Kenya Medical Research Institute; Universite Felix Houphouet Boigny; Lygature
CLINICAL PROTOCOL FOR ASSESSING THE SAFETY AND EFFECTIVENESS OF LOCALLY MANUFACTURED LOW COST MEDICAL EQUIPMENT FOR MATERNAL, NEWBORN, AND CHILD HEALTH: A PROSPECTIVE, NON-RANDOMIZED, QUASI- EXPERIMENTAL, CONTROLLED TRIAL FOR THE IMPROVEMENT OF MATERNAL, NEWBORN, AND CHILD HEALTHCARE IN NAIROBI, KENYA	CCT	Phase-2	1900-01-01	1900-01-01	Recruiting		Neonatal Diseases; Pregnancy and Childbirth	New born: 0 Day-1 Month; Adult: 19 Year-44 Year	Both	0	Day(s)	49	Year(s)	Kenyatta National Hospital	Kenyatta National Hospital
Efficacy and safety of Praziquantel alone or in combination with Artemisinin-based combinations in the treatment of children with Schistosoma mansoni in Mwea, Kirinyaga County, Kenya	RCT	Phase-3	2018-09-10	2019-04-01	Completed		Infections and Infestations	Adolescent: 13 Year-18 Year; Child: 6 Year-12 Year	Both	6	Year(s)	15	Year(s)	Mwea area	Erick M.O. Muok; Vincent O. Were; Peter Wamae
A multicenter, open-label, single-arm study to evaluate the PK, safety, tolerability and efficacy of a new artemether-lumefantrine (2.5 mg:30 mg) dispersible tablet in the treatment of infants and neonates <5 kg body weight with acute uncomplicated Plasmodium falciparum malaria.	CCT	Phase-2	2020-12-21	1900-01-01	Recruiting		Infections and Infestations; Paediatrics	New born: 0 Day-1 Month; Infant: 1 Month-23 Month	Both	1	Day(s)	1	Year(s)	Novartis Pharma AG; Groupe de Recherche Action en Sante GRAS; Unite de Recherche Clinique; KEMRI Kombewa Clinical Research Centre; MRTC University of Science Techniques and Technology; Department of Paediatrics University of Calabar; Hopital General de Reference St Luc; St Pauls Mission Hospital	Medicines for Malaria Venture ; Groupe de Recherche Action en Sante GRAS; Institut de Recherche en sciences de la Sante
PRObiotics and SYNbiotics in infants in Kenya; the PROSYNK study	RCT	Phase-2	2020-10-28	1900-01-01	Closed to recruitment,follow-up continuing	https://trialsjournal.biomedcentral.com/articles/10.1186/s13063-022-06211-1	Digestive System; Nutritional, Metabolic, Endocrine; Paediatrics	Infant: 0 Month-23 Month	Both	1	Day(s)	3	Day(s)	Homa Bay District Hospital	Linsday Hall
A Multicenter, Phase III, Double-blind, Randomized, Active-controlled Study to Evaluate the Efficacy and Safety of VPM1002 in Comparison to BCG in Prevention of Mycobacterium Tuberculosis Infection in Newborn Infants	RCT	Phase-3	2020-11-09	1900-01-01	Recruiting		Infections and Infestations	New born: 0 Day-1 Month	Both	0	Day(s)	14	Day(s)	Ifakara Health Institute IHI; Kenya Medical Research Institute Center for Respiratory Disease Research KEMRI CRDR; Medical Research Council Uganda Virus Research Institute and London School of Hygiene and Tropical Medicines Uganda Research Unit MRC UVRI and LSHTM; Makerere University CISMAC; Respiratory and Meningeal Pathogens Research Unit RMPRU; South African Tuberculosis Vaccine Initiative SAT…	Vakzine Projekt Management GmbH; IAVI
Prevention of maternal and neonatal death/infections with a single oral dose of Azithromycin in women in labor (in low- and middle-income countries): a Randomized Controlled Trial	RCT	Phase-4	2020-04-01	2023-12-15	Recruiting	https://globalnetwork.azurewebsites.net	Infections and Infestations; Obstetrics and Gynecology; Paediatrics; Other	New born: 0 Day-1 Month; Adult: 19 Year-44 Year	Female					Kenya site 12 Eldoret	Indiana University	Moi University
A Phase 3, Randomized, Double-Blind, Placebo-Controlled Study of Voxelotor (GBT440) in Pediatric Participants with Sickle Cell Disease (HOPE Kids 2)	RCT	Phase-3	1900-01-01	2024-02-29	Not yet recruiting		Haematological Disorders; Paediatrics	Preschool Child: 2 Year-5 Year; Child: 6 Year-12 Year; Adolescent: 13 Year-18 Year	Both	2	Year(s)	15	Year(s)	Korle Bu Teaching Hospital; Komfo Anokye Teaching Hospital; Gertrude Childrens Hospital; Kenyatta National Hospital; Strathmore University Medical Centre
Phase III, multi-center, randomized, active-controlled, open-label, three-arm, study in 690 infants who will receive a 3-dose primary series at 6, 10 and 14 weeks of age, of either 3-dose SHAN6â„¢ or SHAN6â„¢ â€“ SHAN 5Â® + bOPV â€“ SHAN6â„¢ or SHAN 5Â® + bOPV â€“ SHAN 5Â® + bOPV â€“ SHAN 5Â® + bOPV + IPV, and a booster dose of either SHAN6â„¢ or SHAN 5Â® + bOPV at 18 months of age	RCT	Phase-3	1900-01-01	1900-01-01	Not yet recruiting		Infections and Infestations; Paediatrics	Infant: 1 Month-23 Month	Both	42	Day(s)	56	Day(s)	KEMRI Ahero Clinical Trials Unit. ; KEMRI Kondele Children Hospital ; KEMRI Centre for Respiratory Disease Research ; Kericho Kenya Medical Research Institute United States of Army Medical Research Directorate ; KEMRI Centre for Global Health Research; KEMRI Centre for Clinical Research	IQVIA
A Phase I Trial of Sevuparin in severe malaria as a potential adjunctive treatment	CCT	Phase-1	1900-01-01	1900-01-01	Not yet recruiting		Infections and Infestations	Infant: 1 Month-23 Month; Preschool Child: 2 Year-5 Year; Child: 6 Year-12 Year	Both	3	Month(s)	12	Year(s)	Kilifi County Hospital KEMRI Wellcome Trust Research Programme	Nicholas Day; Arjen Dondorp; Sarah Walker; Diana Gibb; Elizabeth George; Mainga Hamaluba; Nchafatso Obonyo
Malaria as a risk factor for COVID-19 in western Kenya and Burkina Faso	RCT	Phase-3	2021-01-08	1900-01-01	Recruiting		Infections and Infestations; Infections and Infestations	Infant: 1 Month-23 Month; Preschool Child: 2 Year-5 Year; Child: 6 Year-12 Year; Adolescent: 13 Year-18 Year; Adult: 19 Year-44 Year; Middle Aged: 45 Year(s)-64 Year(s); Aged: 65+ Year(s); 80 and over: 80+ Year; New born: 0 Day-1 Month; Infant: 0 Month-23 Month	Both	0	Day(s)	100	Year(s)	Jaramogi Oginga Odinga Teaching and Referral Hospital; Kisumu County Referral Hospital; Ouagadougou Hospitals; Bobo Dioulasso Hospitals	Kenya Medical Research Institute KEMRI; KEMRICDC; US Centers for Disease Control and Prevention CDC; Groupe de Recherche Action en Sante GRAS
A Phase III double-blind, randomized, active-comparator controlled study in healthy Kenyan adolescents, young children and infants to assess the safety and immunogenicity of Beijing Institute of Biologic Products (BIBP) yellow fever vaccine in comparison to a WHO 17D-204 prequalified comparator yellow fever vaccine, as well as lot-to-lot consistency of immune response to the BIBP yellow fever vac…	RCT	Phase-3	1900-01-01	1900-01-01	Not yet recruiting		Infections and Infestations	Infant: 1 Month-23 Month; Preschool Child: 2 Year-5 Year; Adolescent: 13 Year-18 Year	Both	9	Month(s)	15	Year(s)	Kenya Medical Research Institute United States Army Medical Research Directorate Africa Kenya	PATH
Pharmacokinetic Properties of Antiretroviral and Anti-Tuberculosis Drugs during Pregnancy and Postpartum	CCT	Phase-4	1900-01-01	1900-01-01	Not yet recruiting		Infections and Infestations; Infections and Infestations	New born: 0 Day-1 Month; Adult: 19 Year-44 Year; Middle Aged: 45 Year(s)-64 Year(s); Infant: 0 Month-23 Month; Infant: 1 Month-23 Month; Preschool Child: 2 Year-5 Year; Child: 6 Year-12 Year; Adolescent: 13 Year-18 Year	Both	0	Day(s)	50	Year(s)	KENYA MEDICAL RESEARCH INSTITUTE WALTER REED PROJECT CLINICAL RESEARCH CENTER	Walter Reed Army Institute of Research	Kenya Medical Research Institute
GASTROENTERITIS REHYDRATION OF CHILDREN WITH SEVERE ACUTE MALNUTRITION (GASTRO-SAM).	RCT	Phase-2	2019-08-27	1900-01-01	Active, not recruiting		Infections and Infestations; Paediatrics	Child: 6 Year-12 Year	Both	6	Month(s)	12	Year(s)	Mbale Regional Regional Referral Hospital; Soroti Regional Referral Hospital; Kilifi County Hospital	Peter OlupotOlupot; Mainga Hamaluba; Elizabeth George
Randomized Controlled Trial to Compare the Effect of Corn-Soy Blend + Vegetable Oil and Fish Oil (CSB-VO-FO) With Corn-Soy Blend + Vegetable Oil Alone (CSB-VO) on the Immunological and Microbiota Patterns among Children Aged 9 to 24 months with Moderate Acute Malnutrition (MAM)	RCT	Phase-2	2019-03-01	2020-07-15	Completed		Nutritional, Metabolic, Endocrine	Infant: 1 Month-23 Month	Both	9	Month(s)	24	Month(s)	KEMRI Centre for Clinical Research	University of Texas Medical Branch
Safety and immunogenicity of a travalent bioconjugate vaccine Shigella -: A phase1/2 randomized controlled and aged escending study including dose finding in 9 month old infants	RCT	Phase-1	2019-09-02	2022-07-31	Recruiting		Infections and Infestations	Infant: 1 Month-23 Month; Preschool Child: 2 Year-5 Year; Adult: 19 Year-44 Year; Middle Aged: 45 Year(s)-64 Year(s)	Both	8	Month(s)	50	Year(s)	Kenya Medical Research Institute (KEMRI)/ United States Army Medical Research Directorate- Kenya (USAMRD-K)
A Phase 1b, open-label, age de-escalation, dose-escalation study to evaluate the safety and immunogenicity of different doses of a candidate malaria vaccine; adjuvanted R21(R21/MM) in adults, young children and infants in Kilifi, Kenya.	RCT	Phase-1	2019-04-28	2022-07-31	Closed to recruitment,follow-up continuing		Infections and Infestations	Infant: 0 Month-23 Month; Infant: 1 Month-23 Month; Preschool Child: 2 Year-5 Year; Adult: 19 Year-44 Year; Middle Aged: 45 Year(s)-64 Year(s)	Both	5	Month(s)	45	Year(s)	KEMRI WELLCOME TRUST RESEARCH PROOGRAMME CENTRE FOR GEOGRAPHIC MEDICINE COAST
Childrenâ€™s Oxygen Administration Strategies Trial and Nutrition	RCT	Phase-2	2018-08-10	1900-01-01	Recruiting		Respiratory; Paediatrics	Infant: 1 Month-23 Month; Preschool Child: 2 Year-5 Year; Child: 6 Year-12 Year	Both	6	Month(s)	12	Year(s)	Mbale Regional Referral Hospital; Soroti Regional Referral Hospital; Jinja Regional Referral Hospital; Kilifi County Hospital	Robert O Opoka; Sarah Kiguli; Peter Olupot Olupot; Florence Alaroker; Abner Tagola
Supportive Care and Antibiotics for Severe Pneumonia among Hospitalised Children (SEARCH): A Pragmatic Randomised Controlled Trial	RCT	Phase-3	2019-08-01	1900-01-01	Active, not recruiting		Paediatrics	Infant: 1 Month-23 Month; Preschool Child: 2 Year-5 Year	Both	2	Month(s)	59	Month(s)	Bungoma County Referral Hospital ; Busia County Hospital ; Embu Level 5 Hospital ; Kakamega County Teaching and Referral Hospital ; Kiambu County Referral Hospital ; Kisumu County Hospital ; Kitale County Referral Hospital; Mama Lucy Kibaki Hospital ; Machakos Level 5 Hospital ; Naivasha County Referral Hospital	University of Nairobi ; London School of Hygiene and Tropical Medicine ; Medical Research Council ; Ministry of Health Kenya ; Wellcome Trust ; Department for International Development United Kingdom ; National Institute for Health Research United Kingdom
A Phase 3 Multicenter, Observer Blind, Randomized, Controlled Study to Evaluate Safety (Ages 6 Months to 45 Years) and Non-inferiority (Ages 9-12 Months) of Multi-dose and Single-dose Vial Formulations of EuTCV (Vi-CRM197 Typhoid Conjugate Vaccine) against Typbar TCVÂ® and Lot-to-Lot Consistency of the Immune Response (Ages 9-12 Months) to Multi-dose Vial Formulation EuTCV in Healthy African Part…	RCT	Phase-3	1900-01-01	1900-01-01	Recruiting	https://pactr.samrc.ac.za/	Infections and Infestations; Paediatrics	Infant: 1 Month-23 Month; Adult: 19 Year-44 Year; Preschool Child: 2 Year-5 Year; Child: 6 Year-12 Year; Adolescent: 13 Year-18 Year	Both	6	Month(s)	45	Year(s)	Kenya Medical Research Institute Kericho ; IRESSEF Institut de Recherche en Sante de Surveillance Epidemiologique et de Formation	PATH Center for Vaccine Innovation and Access CVIA
Non- inferiority fractional-doses trial for yellow fever vaccine	RCT	Phase-4	2019-11-15	1900-01-01	Closed to recruitment,follow-up continuing		Infections and Infestations	Infant: 1 Month-23 Month; Adult: 19 Year-44 Year; Middle Aged: 45 Year(s)-64 Year(s); Infant: 0 Month-23 Month; Preschool Child: 2 Year-5 Year; Child: 6 Year-12 Year; Adolescent: 13 Year-18 Year	Both	9	Month(s)	60	Year(s)	Kenya Wellcome Trust Research Program Centre for Geographic Medicine Coast ; Epicentre Mbarara Research Centre	Institute Pastuer Dakar; Uganda National Health Research Organization; Epicentre France	KEMRI Wellcome Trust
Evaluating the combined use of NOn-invasive Ventilation alongside preventative anticonvulsant treatment In children presenting to hospital with CErebral_Malaria and convulsions: a phase I trial	CCT	Phase-1	2020-02-03	1900-01-01	Recruiting		Infections and Infestations	Infant: 1 Month-23 Month; Preschool Child: 2 Year-5 Year; Child: 6 Year-12 Year	Both	3	Month(s)	12	Year(s)	Kilifi Country Hospital	Mainga Hamaluba; Nchafatso Obonyo; Diana Gibb; A Sarah Walker
Evaluation of an audit and feedback intervention to Reduce Gentamicin Prescription Errors in Newborn Treatment (ReGENT) in neonatal inpatient care in Kenya: A controlled interrupted time series study protocol	RCT	Phase-1	1900-01-01	1900-01-01	Active, not recruiting		Other	New born: 0 Day-1 Month	Both	0	Day(s)	28	Day(s)	KEMRI Wellcome Trust Research Programme
A staged Phase I/II observer-blind, randomised, controlled, multi-country study to evaluate the safety, reactogenicity, and immune responses to the GVGH altSonflex1-2-3 vaccine against S. sonnei and S. flexneri, serotypes 1b, 2a, and 3a, in adults in Europe (Stage 1) followed by age de-escalation from adults to children and infants, and dose-finding in infants in Africa (Stage 2)_x000D_ _x000D_	RCT	Phase-2	2021-10-06	1900-01-01	Recruiting		Infections and Infestations	Infant: 1 Month-23 Month; Preschool Child: 2 Year-5 Year; Adult: 19 Year-44 Year; Middle Aged: 45 Year(s)-64 Year(s)	Both	9	Month(s)	50	Year(s)	Centrum Voor Vaccinologie; Kenya Medical research Institute KEMRI United States Army Medical Research Directorate Africa Kenya MRD AK	US Department of Defence Walter Reed Army Institute of Research
A Phase III, Multicenter, Double blind, Randomized Study of SII Yellow Fever Vaccine to Compare Safety and Immunogenicity with STAMARIL	RCT	Phase-3	1900-01-01	1900-01-01	Not yet recruiting		Infections and Infestations	Infant: 1 Month-23 Month; Preschool Child: 2 Year-5 Year; Child: 6 Year-12 Year; Adolescent: 13 Year-18 Year; Adult: 19 Year-44 Year; Middle Aged: 45 Year(s)-64 Year(s); Infant: 1 Month-23 Month; Preschool Child: 2 Year-5 Year; Child: 6 Year-12 Year; Adolescent: 13 Year-18 Year; Adult: 19 Year-44 Year; Middle Aged: 45 Year(s)-64 Year(s)	Both; Both	1	Year(s)	60	Year(s)	Kenya Medical Research Institute Centre for Research Disease Research CRDR; Kisumu County Referral Hospital
Safety and Efficacy of L9LS, a Human Monoclonal Antibody Against Plasmodium falciparum, in an Age De-Escalation, Dose-Escalation Trial and a Randomized, Placebo-Controlled, Double-Blind Trial of Children in Western Kenya	RCT	Phase-2	1900-01-01	1900-01-01	Recruiting		Infections and Infestations	Infant: 1 Month-23 Month; Preschool Child: 2 Year-5 Year; Child: 6 Year-12 Year	Both	5	Month(s)	10	Year(s)	Siaya County Referral Hospital; Kogelo Dispensary for part 2	Centers for Disease Control and Prevention; Liverpool School of Tropical Medicine and Hygiene
An open-label randomised controlled trial comparing novel combination and currently used antibiotic regimens for the empiric treatment of neonatal sepsis with a run-in confirmatory pharmacokinetic phase: NeoSep01	RCT	Phase-4	1900-01-01	1900-01-01	Not yet recruiting		Neonatal Diseases	New born: 0 Day-1 Month	Both	1	Day(s)	28	Day(s)	Kilifi County Hospital; Chris Hani Baragwanath Academic Hospital ; Tygerberg Childrens Hospital Stellenbosch University	MRC Clinical Trials Unit at UCL; St Georges University of London ; University of Antwerp	KEMRI Wellcome Trust

## Sheet: Infant Clinical Tr Institutions
	Infant Clinical Trials institutions
1	kenyatta national hospital
2	KEMRI
3	Moi Teaching and Referral Hospital
4	Gertrude Children Hospital
5	Strathmore University Medical Centre
6	KEMRI Wellcome Trust Research Programme
7	Jaramogi Oginga Odinga Teaching and Referral Hospital
